# Supplementary material for: Two molybdenyl carbonates with different dimensional structures exhibiting huge differences in band gaps
Source: Royal Society of Chemistry journal article supplement (doi:10.1039/d1qi01366a), 2021-11-26
Supplement: d1qi01366a1.pdf [file d1qi01366a1.pdf]

## Supporting Information

# Two Molybdenyl Carbonates with Different Dimensional Structure Exhibiting Huge Difference in Band Gaps

Yunqiao Guo,<sup>‡ a</sup> Yalan Deng,<sup>‡ a</sup> Ting Zheng,<sup>a</sup> Ling Huang,<sup>\* a</sup> Daojiang Gao,<sup>a</sup> Jian Bi<sup>a</sup> and Guohong Zou<sup>\* b</sup>

<sup>a</sup> College of Chemistry and Materials Science, Sichuan Normal University, Chengdu, 610068, P. R. China.

<sup>b</sup> College of Chemistry, Sichuan University, Chengdu, 610064, P. R. China.

E-mail: huangl026@sina.com; zough@scu.edu.cn

<sup>‡</sup> These authors contributed equally to this work.

### Table of contents

| Sections    | Titles                                                                                                                                                       | Pages |
|-------------|--------------------------------------------------------------------------------------------------------------------------------------------------------------|-------|
| Sections S1 | Instruments and Computational Details                                                                                                                        | S2-S3 |
| Table S1    | Fractional atomic coordinates and isotropic or equivalent isotropic displacement parameters ( $\text{\AA}^2$ ) for $\text{Cs}_2\text{MoO}_3(\text{CO}_3)$ .  | S4    |
| Table S2    | Fractional atomic coordinates and isotropic or equivalent isotropic displacement parameters ( $\text{\AA}^2$ ) for $\text{Cs}_3\text{MoO}_4(\text{HCO}_3)$ . | S5    |
| Table S3    | Selected Bond lengths ( $\text{\AA}$ ) and angles (deg) for $\text{Cs}_2\text{MoO}_3(\text{CO}_3)$ .                                                         | S6    |
| Table S4    | Selected Bond lengths ( $\text{\AA}$ ) and angles (deg) for $\text{Cs}_3\text{MoO}_4(\text{HCO}_3)$ .                                                        | S7    |
| Fig. S1     | The crystal photographs of (a) $\text{Cs}_2\text{MoO}_3(\text{CO}_3)$ and (b) $\text{Cs}_3\text{MoO}_4(\text{HCO}_3)$ .                                      | S8    |
| Fig. S2     | The IR spectra of (a) $\text{Cs}_2\text{MoO}_3(\text{CO}_3)$ and (b) $\text{Cs}_3\text{MoO}_4(\text{HCO}_3)$ .                                               | S8    |
| Fig. S3     | TGA curves of (a) $\text{Cs}_2\text{MoO}_3(\text{CO}_3)$ and (b) $\text{Cs}_3\text{MoO}_4(\text{HCO}_3)$ under $\text{N}_2$ atmosphere.                      | S9    |
| Fig. S4     | Calculated band structures of (a) $\text{Cs}_2\text{MoO}_3(\text{CO}_3)$ and (b) $\text{Cs}_3\text{MoO}_4(\text{HCO}_3)$ .                                   | S9    |
| References  |                                                                                                                                                              | S10   |

## Section S1. Instruments and Computational Details

### Single crystal structure determination

Single crystal X-ray diffraction data of  $\text{Cs}_2\text{MoO}_3(\text{CO}_3)$  and  $\text{Cs}_3\text{MoO}_4(\text{HCO}_3)$  were collected on a Bruker D8 Venture diffractometer with graphite monochromatic Mo  $K\alpha$  radiation at 150(2) K. The structures were solved by the direct methods and refined with SHELX-2014.<sup>1</sup> The position of the heavy atoms is determined by the heavy atom method, and all the hydrogen atoms were located geometrically or in a difference Fourier map. Both of the structures were verified with PLATON.<sup>2</sup> Relevant crystallographic data for  $\text{Cs}_2\text{MoO}_3(\text{CO}_3)$  and  $\text{Cs}_3\text{MoO}_4(\text{HCO}_3)$  are summarized in Table 1. Further information including atomic coordinates and isotropic displacement coefficients, selected bond lengths are listed in Tables S1-S4 in the supporting information.

### Powder X-ray Diffraction

X-ray diffraction were used to confirm the purity of the compounds, and polycrystalline materials were measured at room temperature on a Smart lab powder X-ray diffractometer using Cu  $K\alpha$  radiation ( $\lambda=1.540598 \text{ \AA}$ ). The crystal samples were ground into powder suitable for diffraction experiments, and then the sample powder was put into a test piece with a very flat surface. The angular range of  $2\theta$  is from 5 to  $70^\circ$ , and the scan step width is  $0.08^\circ$  and step time is 0.2 s.

### Infrared Spectroscopy

IR spectra were collected using a Vertex 70 Fourier transform infrared (FT-IR) spectrometer in the range of  $4000\text{-}400 \text{ cm}^{-1}$ . 1 mg powder samples of title compounds and dry KBr about 100 mg were mixed evenly in an agate mortar. After thorough grinding, the mixture was placed evenly between the solid tablet mold, then pressed and hold for 1-2 minutes under a pressure of about  $10 \text{ T/cm}^2$ , and a uniform translucent tablet with a diameter of 13 mm and a thickness of about 1 mm was obtained.

### Thermal Analysis

Thermogravimetric analysis (TGA) was performed on a Netzsch STA 409 PC. A 10 mg crystal samples were sealed in a platinum crucible and heated from room temperature to  $800^\circ \text{ C}$  at a rate

of 10 °C/min in a N<sub>2</sub> atmosphere.

### **UV-vis Diffuse Reflectance Spectroscopy**

UV-vis diffuse reflectance spectra of Cs<sub>2</sub>MoO<sub>3</sub>(CO<sub>3</sub>) and Cs<sub>3</sub>MoO<sub>4</sub>(HCO<sub>3</sub>) were recorded at room temperature with a PerkinElmer Lambda-950 UV/VIS/NIR spectrophotometer and scanned in the range of 190-800 nm.

### **Theoretical Calculations**

In order to better understand the electronic structures of Cs<sub>2</sub>MoO<sub>3</sub>(CO<sub>3</sub>) and Cs<sub>3</sub>MoO<sub>4</sub>(HCO<sub>3</sub>), the theoretical calculations were processed using density functional theory (DFT) in the CASTEP program suite.<sup>3</sup> All calculations were performed using the Perdew-Burke-Ernzerhof (PBE) under generalized gradient approximation (GGA).<sup>4</sup> The energy cutoffs of the plane wave basis and the *k*-point sampling Brillouin zones for Cs<sub>2</sub>MoO<sub>3</sub>(CO<sub>3</sub>) and Cs<sub>3</sub>MoO<sub>4</sub>(HCO<sub>3</sub>) were set to be 750 eV / 830 eV, 1 × 1 × 1 / 2 × 4 × 2, respectively.

**Table S1.** Atomic coordinates ( $\times 10^4$ ) and equivalent isotropic displacement parameters ( $\text{\AA}^2 \times 10^3$ ), and calculated Bond Valence Sum for  $\text{Cs}_2\text{MoO}_3(\text{CO}_3)$ .  $U_{\text{eq}}$  is defined as one third of the trace of the orthogonalized  $U_{ij}$  tensor.

| atom | x       | y       | z        | $U_{\text{eq}} (\text{\AA}^2)$ | BVS   |
|------|---------|---------|----------|--------------------------------|-------|
| Cs1  | 6665(1) | 2500    | 3145(1)  | 22(1)                          | 1.126 |
| Cs2  | 6641(1) | 2500    | 10193(1) | 25(1)                          | 0.934 |
| Mo1  | 5288(1) | 2500    | 7594(1)  | 17(1)                          | 5.920 |
| O1   | 6285(4) | 4212(5) | 6403(2)  | 23(1)                          | 1.962 |
| O2   | 5346(4) | 4671(6) | 8326(2)  | 22(1)                          | 2.158 |
| O3   | 3221(6) | 2500    | 7157(4)  | 22(1)                          | 1.994 |
| O4   | 7447(6) | 2500    | 5179(3)  | 27(1)                          | 1.973 |
| C1   | 6705(8) | 2500    | 5951(5)  | 21(1)                          | 3.932 |

**Table S2.** Atomic coordinates ( $\times 10^4$ ) and equivalent isotropic displacement parameters ( $\text{\AA}^2 \times 10^3$ ), and calculated Bond Valence Sum for  $\text{Cs}_3\text{MoO}_4(\text{HCO}_3)$ .  $U_{(\text{eq})}$  is defined as one third of the trace of the orthogonalized  $U_{ij}$  tensor.

| atom | x           | y            | z           | $U_{\text{eq}} (\text{\AA}^2)$ | BVS   |
|------|-------------|--------------|-------------|--------------------------------|-------|
| C1   | 3260 (9)    | 3050 (3)     | 4293 (8)    | 14 (4)                         | 4.652 |
| C2   | 4242 (9)    | 8010 (3)     | 5720 (8)    | 18 (4)                         | 4.669 |
| Cs1  | 3751.7 (11) | 2851 (2)     | 6400.2 (17) | 14.1 (4)                       | 0.894 |
| Cs2  | 2903.2 (14) | 7686 (2)     | 7742.4 (13) | 12.6 (5)                       | 1.204 |
| Cs3  | 5219 (15)   | 2533.6 (15)  | 4602.9 (18) | 13.1 (5)                       | 0.944 |
| Cs4  | 7267.4 (15) | 7362 (2)     | 5402 (17)   | 13.8 (5)                       | 0.790 |
| Cs5  | 8734.9 (11) | 7141 (2)     | 3600.5 (17) | 15.1 (4)                       | 0.845 |
| Cs6  | 4597.4 (15) | 12624.1 (18) | 2258.7 (13) | 12.6 (5)                       | 1.024 |
| Mo1  | 1467.2 (19) | 2687 (3)     | 6420.1 (19) | 8.1 (6)                        | 5.691 |
| Mo2  | 6024 (2)    | 7554 (2)     | 3583 (2)    | 10 (6)                         | 6.195 |
| O1   | 441 (12)    | 2820 (3)     | 6498 (14)   | 24 (4)                         | 1.841 |
| O2   | 1730 (18)   | 2670 (2)     | 5490 (2)    | 25 (6)                         | 1.833 |
| O3   | 1813 (13)   | 380 (3)      | 6861 (13)   | 26 (5)                         | 1.911 |
| O4   | 1903 (12)   | 4890 (3)     | 6859 (13)   | 21 (4)                         | 1.915 |
| O5   | 5732 (13)   | 5310 (3)     | 3142 (13)   | 27 (5)                         | 2.101 |
| O6   | 5584 (11)   | 9740 (3)     | 3208 (12)   | 18 (4)                         | 2.081 |
| O7   | 7016 (11)   | 7880 (2)     | 3542 (13)   | 20 (4)                         | 2.035 |
| O8   | 5738 (18)   | 7360 (2)     | 4532 (19)   | 21 (5)                         | 1.655 |
| O9   | 3643 (11)   | 2810 (2)     | 3734 (9)    | 17 (4)                         | 2.174 |
| O10  | 2679 (7)    | 1950 (2)     | 4367 (9)    | 16 (3)                         | 1.786 |
| O11  | 3434 (8)    | 4278 (18)    | 4781 (7)    | 16 (3)                         | 2.052 |
| O12  | 4068 (8)    | 9241 (19)    | 5235 (7)    | 19 (3)                         | 2.069 |
| O13  | 4827 (7)    | 6920 (2)     | 5669 (8)    | 16 (3)                         | 1.821 |
| O14  | 3848 (11)   | 7770 (2)     | 6273 (10)   | 17 (4)                         | 2.177 |
| H10  | 2200 (6)    | 1800 (4)     | 4530 (13)   | 30 (7)*                        | 1.000 |
| H12  | 3610 (10)   | 9800 (4)     | 5000 (13)   | 70 (10)*                       | 0.797 |

**Table S3.** Selected Bond lengths (Å) and angles (deg) for Cs<sub>2</sub>MoO<sub>3</sub>(CO<sub>3</sub>).

|                                          |             |                                          |             |
|------------------------------------------|-------------|------------------------------------------|-------------|
| Cs1—O1 <sup>iii</sup>                    | 3.222 (3)   | Mo1—O1 <sup>vi</sup>                     | 2.168 (3)   |
| Cs1—O2 <sup>iii</sup>                    | 3.197 (4)   | Mo1—O2                                   | 1.738 (3)   |
| Cs1—O2 <sup>i</sup>                      | 3.005 (4)   | Mo1—O3                                   | 1.761 (5)   |
| Cs1—O3 <sup>iv</sup>                     | 3.2350 (7)  | Mo1—O3 <sup>xiii</sup>                   | 2.364 (5)   |
| Cs1—O4                                   | 2.956 (5)   | O1—C1                                    | 1.314 (5)   |
| Cs2—O1 <sup>vii</sup>                    | 3.182 (3)   | O4—C1                                    | 1.246 (9)   |
| Cs2—O2 <sup>ix</sup>                     | 3.197 (3)   | O3—Cs1 <sup>v</sup>                      | 3.2349 (7)  |
| Cs2—O2 <sup>vi</sup>                     | 3.167 (3)   | Cs2—O4 <sup>xiii</sup>                   | 3.383 (5)   |
| Cs2—O4 <sup>vii</sup>                    | 3.2866 (12) | O4—Cs1—O2 <sup>i</sup>                   | 75.47 (10)  |
| O2—Mo1—O2 <sup>vi</sup>                  | 106.4 (2)   | O4—Cs1—O2 <sup>ii</sup>                  | 75.47 (10)  |
| O2—Mo1—O3                                | 103.67 (15) | O4—Cs1—O2 <sup>iii</sup>                 | 138.12 (8)  |
| O2—Mo1—O1 <sup>vi</sup>                  | 149.59 (14) | O2 <sup>i</sup> —Cs1—O2 <sup>iii</sup>   | 142.71 (7)  |
| O2 <sup>vi</sup> —Mo1—O1 <sup>vi</sup>   | 92.97 (14)  | O2 <sup>ii</sup> —Cs1—O2 <sup>iii</sup>  | 96.38 (10)  |
| O3—Mo1—O1 <sup>vi</sup>                  | 93.85 (17)  | O4—Cs1—O2 <sup>iv</sup>                  | 138.12 (8)  |
| O1 <sup>vi</sup> —Mo1—O1                 | 60.80 (18)  | O2 <sup>ii</sup> —Cs1—O2 <sup>iv</sup>   | 142.71 (7)  |
| O2—Mo1—O3 <sup>xiii</sup>                | 83.34 (14)  | O2 <sup>iii</sup> —Cs1—O2 <sup>iv</sup>  | 69.09 (12)  |
| O3—Mo1—O3 <sup>xiii</sup>                | 167.92 (9)  | O2 <sup>i</sup> —Cs1—O1 <sup>iii</sup>   | 162.95 (9)  |
| O1 <sup>vi</sup> —Mo1—O3 <sup>xiii</sup> | 75.78 (14)  | O2 <sup>ii</sup> —Cs1—O1 <sup>iii</sup>  | 99.58 (9)   |
| O4—C1—O1 <sup>vi</sup>                   | 123.4 (3)   | O2 <sup>iii</sup> —Cs1—O1 <sup>iii</sup> | 52.68 (9)   |
| O1—C1—O1 <sup>vi</sup>                   | 113.2 (6)   | O2 <sup>iv</sup> —Cs1—O1 <sup>iii</sup>  | 97.80 (9)   |
| O1 <sup>iii</sup> —Cs1—O1 <sup>iv</sup>  | 81.72 (12)  | O4—Cs1—O1 <sup>iv</sup>                  | 87.65 (9)   |
| O2 <sup>i</sup> —Cs1—O3 <sup>v</sup>     | 125.93 (11) | O4—Cs1—O1 <sup>i</sup>                   | 124.76 (9)  |
| O2 <sup>ii</sup> —Cs1—O3 <sup>v</sup>    | 52.49 (11)  | O2 <sup>i</sup> —Cs1—O1 <sup>i</sup>     | 49.66 (8)   |
| O2 <sup>iii</sup> —Cs1—O3 <sup>v</sup>   | 50.63 (11)  | O2 <sup>ii</sup> —Cs1—O1 <sup>i</sup>    | 92.98 (8)   |
| O1 <sup>iv</sup> —Cs1—O3 <sup>v</sup>    | 134.04 (10) | O2 <sup>iii</sup> —Cs1—O1 <sup>i</sup>   | 96.26 (8)   |
| O4—Cs1—O3 <sup>iv</sup>                  | 97.10 (9)   | O2 <sup>iv</sup> —Cs1—O1 <sup>i</sup>    | 56.77 (8)   |
| O2 <sup>i</sup> —Cs1—O3 <sup>iv</sup>    | 52.49 (11)  | O1 <sup>iii</sup> —Cs1—O1 <sup>i</sup>   | 147.38 (6)  |
| O2 <sup>ii</sup> —Cs1—O3 <sup>iv</sup>   | 125.93 (11) | O1 <sup>iv</sup> —Cs1—O1 <sup>i</sup>    | 94.83 (9)   |
| O2 <sup>iii</sup> —Cs1—O3 <sup>iv</sup>  | 119.30 (11) | O3 <sup>v</sup> —Cs1—O1 <sup>i</sup>     | 118.11 (10) |
| O1 <sup>iii</sup> —Cs1—O3 <sup>iv</sup>  | 134.04 (10) | O3 <sup>iv</sup> —Cs1—O1 <sup>i</sup>    | 47.41 (10)  |

Symmetry codes: (i)  $-x+3/2, -y+1, z-1/2$ ; (ii)  $-x+3/2, y-1/2, z-1/2$ ; (iii)  $-x+1, y-1/2, -z+1$ ; (iv)  $-x+1, -y+1, -z+1$ ; (v)  $-x+1, -y, -z+1$ ; (vi)  $x, -y+1/2, z$ ; (vii)  $-x+3/2, -y+1, z+1/2$ ; (viii)  $-x+3/2, y-1/2, z+1/2$ ; (ix)  $-x+1, -y+1, -z+2$ ; (x)  $-x+1, y-1/2, -z+2$ ; (xi)  $-x+3/2, -y, z+1/2$ ; (xii)  $x-1/2, y, -z+3/2$ ; (xiii)  $x+1/2, y, -z+3/2$ ; (xiv)  $-x+3/2, -y, z-1/2$ .

**Table S4.** Selected Bond lengths (Å) and angles (deg) for Cs<sub>3</sub>MoO<sub>4</sub>(HCO<sub>3</sub>).

|                        |            |                        |            |
|------------------------|------------|------------------------|------------|
| C1—O9                  | 1.224 (7)  | C2—O12                 | 1.225 (7)  |
| C1—O10                 | 1.231 (7)  | C2—O13                 | 1.231 (7)  |
| C1—O11                 | 1.226 (7)  | C2—O14                 | 1.226 (7)  |
| Mo1—O1                 | 1.77 (2)   | Mo2—O5                 | 1.724 (19) |
| Mo1—O2                 | 1.76 (4)   | Mo2—O6                 | 1.733 (19) |
| Mo1—O3                 | 1.785 (19) | Mo2—O7                 | 1.72 (2)   |
| Mo1—O4                 | 1.792 (19) | Mo2—O8                 | 1.81 (3)   |
| Cs1—O1 <sup>vi</sup>   | 2.95 (2)   | Cs2—O3 <sup>v</sup>    | 3.02 (2)   |
| Cs1—O4                 | 3.54 (2)   | Cs2—O4                 | 2.962 (19) |
| Cs1—O5 <sup>x</sup>    | 3.51 (2)   | Cs2—O5 <sup>x</sup>    | 3.12 (2)   |
| Cs1—O11                | 3.145 (13) | Cs2—O6 <sup>iv</sup>   | 3.198 (19) |
| Cs1—O12 <sup>xiv</sup> | 3.191 (13) | Cs2—O7 <sup>iv</sup>   | 3.201 (17) |
| Cs1—O13                | 3.464 (15) | Cs2—O9 <sup>ix</sup>   | 3.22 (2)   |
| Cs1—O14 <sup>xiv</sup> | 3.267 (15) | Cs2—O10 <sup>ix</sup>  | 3.169 (16) |
| Cs1—O14                | 3.168 (15) | Cs2—O14                | 3.140 (14) |
| Cs3—O1 <sup>vi</sup>   | 3.49 (3)   | Cs4—O2 <sup>vii</sup>  | 3.321 (16) |
| Cs3—O2 <sup>vi</sup>   | 3.07 (4)   | Cs4—O2 <sup>vi</sup>   | 3.359 (17) |
| Cs3—O5                 | 3.33 (2)   | Cs4—O3 <sup>vi</sup>   | 3.29 (2)   |
| Cs3—O6 <sup>xiv</sup>  | 3.18 (2)   | Cs4—O4 <sup>vii</sup>  | 3.25 (2)   |
| Cs3—O8                 | 3.222 (16) | Cs4—O7                 | 3.44 (2)   |
| Cs3—O8 <sup>xiv</sup>  | 3.438 (15) | Cs4—O8                 | 3.08 (3)   |
| Cs3—O9                 | 3.15 (2)   | Cs4—O10 <sup>vi</sup>  | 3.423 (14) |
| Cs3—O11                | 3.286 (13) | Cs4—O11 <sup>vii</sup> | 3.156 (13) |
| Cs3—O12 <sup>xiv</sup> | 3.117 (14) | Cs4—O12 <sup>vii</sup> | 3.280 (15) |
| Cs3—O13                | 3.484 (14) | Cs4—O14 <sup>vii</sup> | 3.15 (2)   |
| Cs5—O4 <sup>viii</sup> | 3.61 (2)   | Cs6—O1 <sup>xiii</sup> | 3.611 (19) |
| Cs5—O6 <sup>vii</sup>  | 3.480 (18) | Cs6—O3 <sup>xiii</sup> | 3.09 (2)   |
| Cs5—O7                 | 2.999 (19) | Cs6—O4 <sup>xii</sup>  | 3.20 (2)   |
| Cs5—O9 <sup>vi</sup>   | 3.189 (15) | Cs6—O6                 | 3.053 (19) |
| Cs5—O9 <sup>vii</sup>  | 3.247 (15) | O2—Mo1—O1              | 109.5 (14) |
| Cs5—O9 <sup>vii</sup>  | 3.247 (15) | O14—C2—O13             | 116.4 (14) |
| Cs5—O11 <sup>vii</sup> | 3.191 (13) | O9—C1—O10              | 117.2 (14) |

Symmetry codes: (i)  $x-1/2, -y+3/2, z$ ; (ii)  $-x+1/2, y-1/2, z-1/2$ ; (iii)  $x-1/2, -y+1/2, z$ ; (iv)  $x+1/2, -y+3/2, z$ ; (v)  $-x+1, -y+2, z+1/2$ ; (vi)  $x+1/2, -y+1/2, z$ ; (vii)  $-x+1, -y+1, z-1/2$ ; (viii)  $x, y+1, z$ ; (ix)  $-x+1, -y+1, z+1/2$ ; (x)  $-x+1/2, y+1/2, z+1/2$ ; (xi)  $-x+1, -y+2, z-1/2$ ; (xii)  $-x+1/2, y+3/2, z-1/2$ ; (xiii)  $-x+1/2, y+1/2, z-1/2$ ; (xiv)  $-x+1/2, y-1/2, z+1/2$ ; (xv)  $x, y-1, z$ ; (xvi)  $-x+1/2, y-3/2, z+1/2$

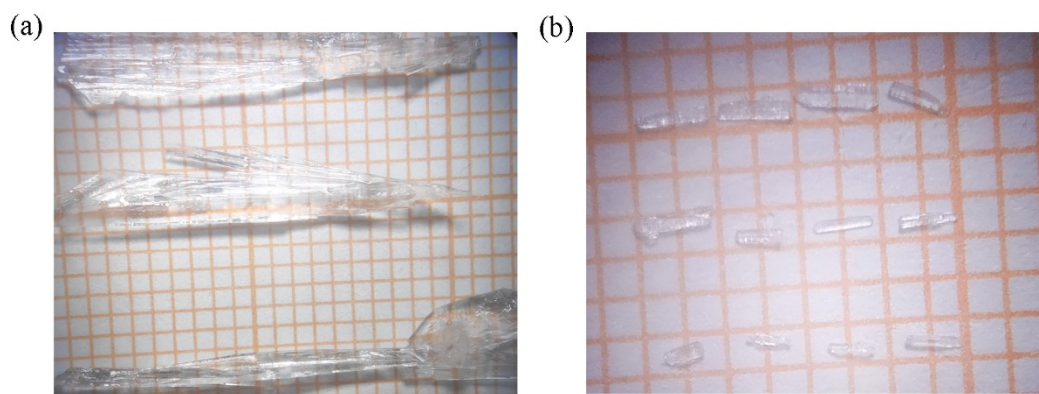

**Fig. S1** The crystal photographs of (a)  $\text{Cs}_2\text{MoO}_3(\text{CO}_3)$  and (b)  $\text{Cs}_3\text{MoO}_4(\text{HCO}_3)$ .

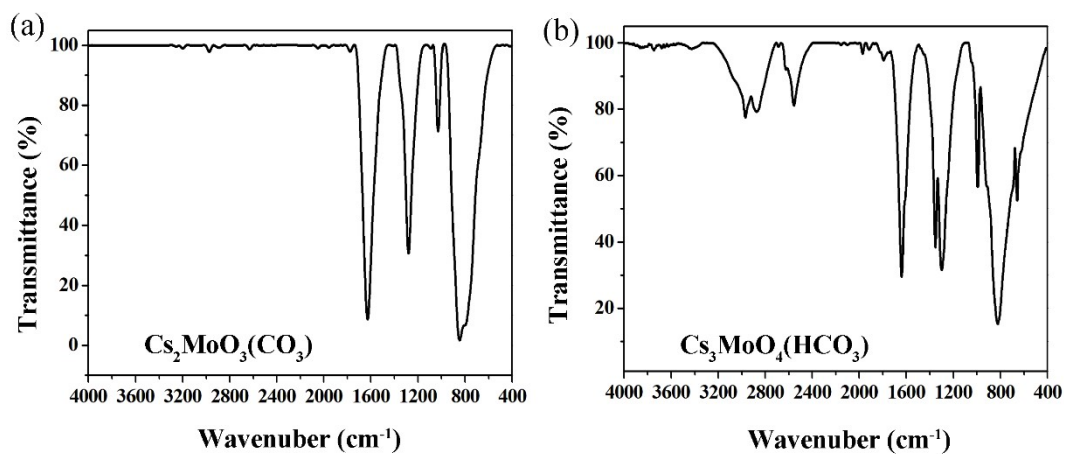

**Fig. S2** The IR spectra of compounds (a)  $\text{Cs}_2\text{MoO}_3(\text{CO}_3)$  and (b)  $\text{Cs}_3\text{MoO}_4(\text{HCO}_3)$ .



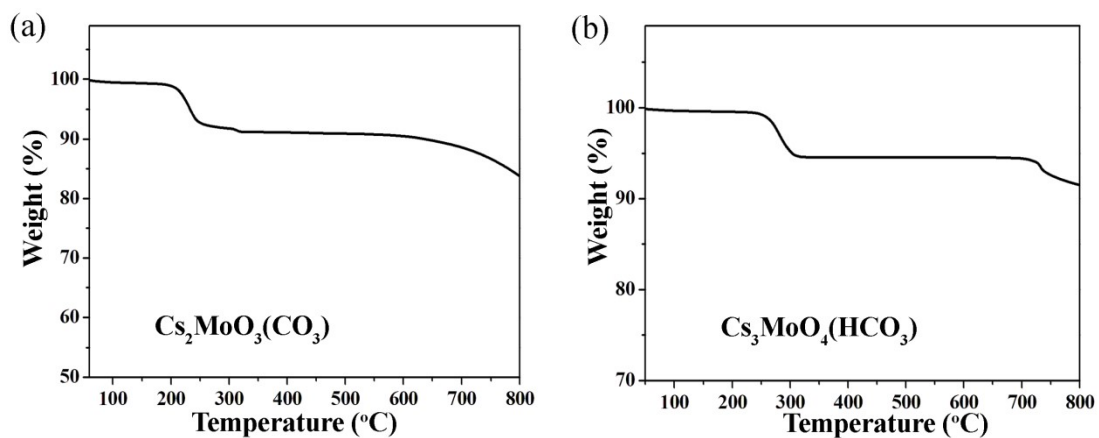

**Fig. S3** TGA curves of compounds (a)  $\text{Cs}_2\text{MoO}_3(\text{CO}_3)$  and (b)  $\text{Cs}_3\text{MoO}_4(\text{HCO}_3)$  under  $\text{N}_2$  atmosphere.

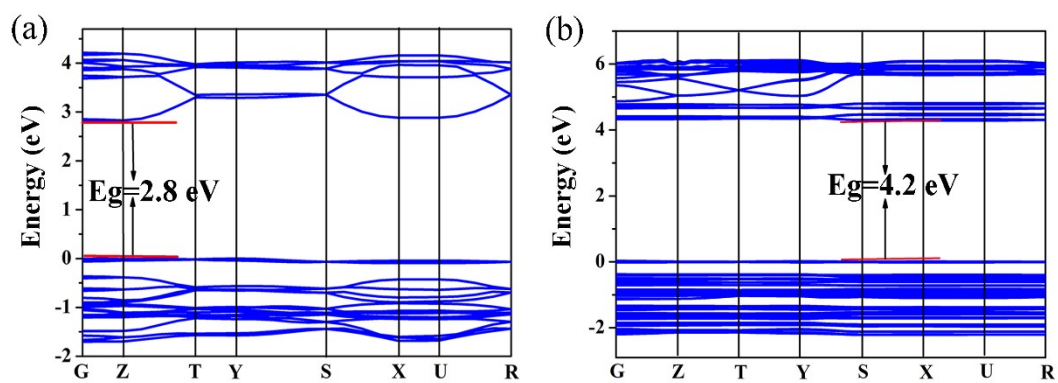

**Fig. S4** Calculated band structure of (a)  $\text{Cs}_2\text{MoO}_3(\text{CO}_3)$  and (b)  $\text{Cs}_3\text{MoO}_4(\text{HCO}_3)$ .

## References

1. Sheldrick, G. M. A short history of SHELX-2014. *Acta Crystallogr.* **2008**, *64*, 112-122.
2. Spek, A. L. Single-crystal structure validation with the program PLATON. *J. Appl. Crystallogr.* **2003**, *36*, 7-13.
3. Segall, M.D.; Lindan, P. J. D.; Probert, M. J. First-principles simulation: ideas, illustrations and the CASTEP code, *J. Phys. Condens. Matter* **2002**, *14*, 2717.
4. Perdew, J. P.; Burke, K.; Ernzerhof, M. Generalized gradient approximation made simple. *Phys. Rev. Lett.* **1996**, *77*, 3865–3868.
